# Supplementary material for: Doping MoS2 monolayer with nonmetal atoms to tune its electronic and magnetic properties, and chemical activity: a computational study
Source: Royal Society of Chemistry journal article supplement (doi:10.1039/c9nj00466a), 2019-01-01
Supplement: c9nj00466a1.pdf [file c9nj00466a1.pdf]

## Supporting Information

### **Doping MoS<sub>2</sub> monolayer with nonmetal atoms to tune its electronic and magnetic properties as well as chemical activity: a theoretical insight**

Xin Wen,<sup>a,c</sup> Shansheng Yu,<sup>b,\*</sup> Yongcheng Wang,<sup>c</sup> Yuejie Liu,<sup>a,\*</sup> Hongxia Wang,<sup>a</sup>  
Jingxiang Zhao<sup>a,\*</sup>

<sup>a</sup> College of Chemistry and Chemical Engineering, Harbin Normal University, Harbin, 150025, China

<sup>b</sup> Department of Materials Science, Jilin University, Changchun 130012, China

<sup>c</sup> College of Chemistry and Chemical Engineering, Northwest Normal University, Gansu, 730070, China

\* To whom correspondence should be addressed. Email: *xjz\_hmily@163.com* (J. Z.);  
*yuss@jlu.edu.cn* (S. Y); *zjx1103@hotmail.com* (J. L)

**Table S1.** The computed adsorption energies (eV) of H<sub>2</sub>, N<sub>2</sub>, O<sub>2</sub>, NO, and NO<sub>2</sub> on pristine and doped MoS<sub>2</sub> monolayers by O, B, C, N, and P atoms. <sup>a</sup> the adsorption energy of metal-stable configurations of H<sub>2</sub> and NO<sub>2</sub>, <sup>b</sup> the reaction energies (eV) from the meta-stable configurations of H<sub>2</sub> and NO<sub>2</sub> to the most stable configurations.

|                           | H <sub>2</sub>                         | N <sub>2</sub> | O <sub>2</sub> | NO    | NO <sub>2</sub>                        |
|---------------------------|----------------------------------------|----------------|----------------|-------|----------------------------------------|
| pristine MoS <sub>2</sub> | -0.10                                  | -0.14          | -0.12          | -0.18 | -0.20                                  |
| O-MoS <sub>2</sub>        | -0.14                                  | -0.20          | -0.17          | -0.26 | -0.28                                  |
| B-MoS <sub>2</sub>        | -0.11 <sup>a</sup> /-1.19 <sup>b</sup> | -1.48          | -1.92          | -3.36 | -2.16 <sup>a</sup> /-1.07 <sup>b</sup> |
| C-MoS <sub>2</sub>        | -0.15 <sup>a</sup> /-1.93 <sup>b</sup> | -1.28          | -1.08          | -2.32 | -1.88 <sup>a</sup> /-0.50 <sup>b</sup> |
| N-MoS <sub>2</sub>        | -0.16                                  | -0.22          | -0.36          | -1.61 | -0.90 <sup>a</sup> /-0.59 <sup>b</sup> |
| P-MoS <sub>2</sub>        | -0.10                                  | -0.14          | -0.75          | -0.11 | -1.54 <sup>a</sup> /-0.63 <sup>b</sup> |

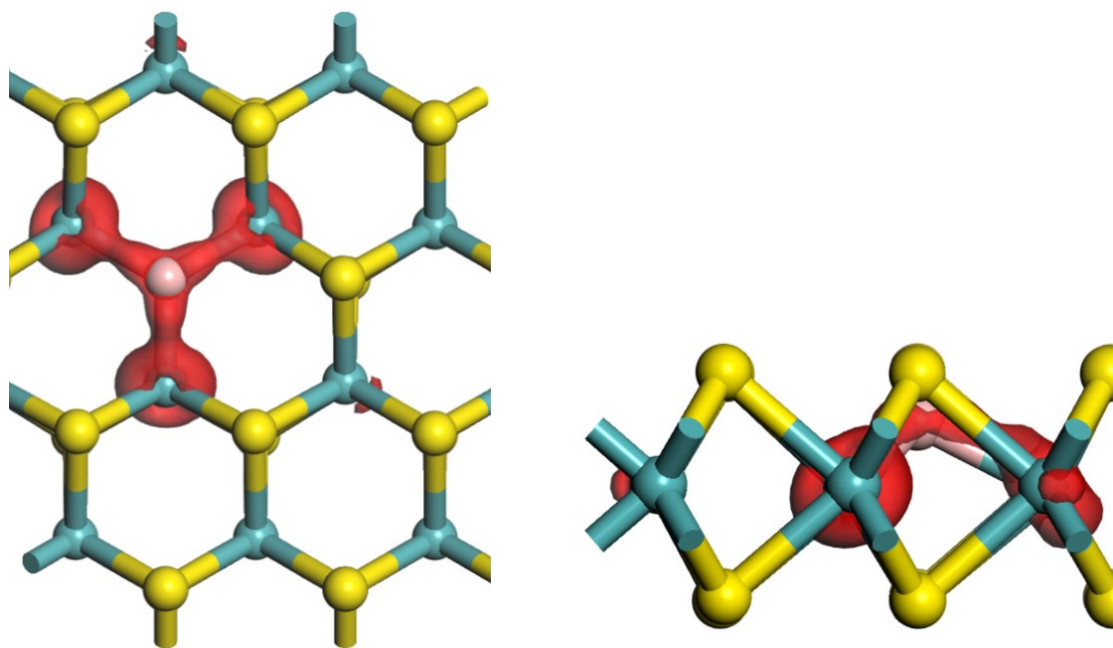

**Figure S1.** The computed spin density of B-doped MoS<sub>2</sub> nanosheet. The isosurface value is 0.01 electrons/a.u.<sup>3</sup>.

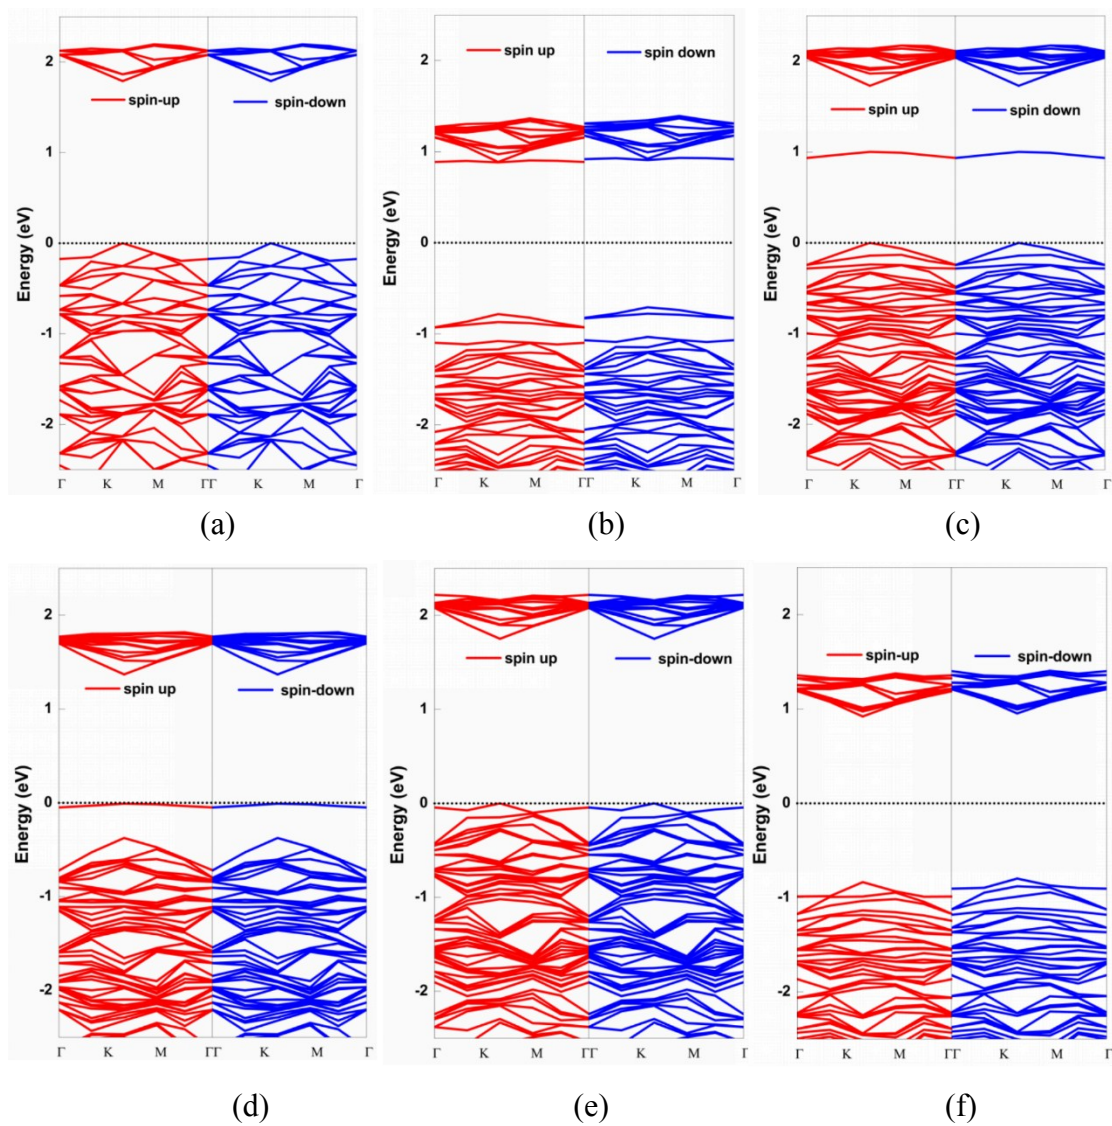

**Figure S2.** The computed band structures of (a) pristine and nonmetal doped MoS<sub>2</sub> nanosheets with (b) B, (c) C, (d) N, (e) P, and (f) O atoms. The Fermi level was set zero in dotted lines.

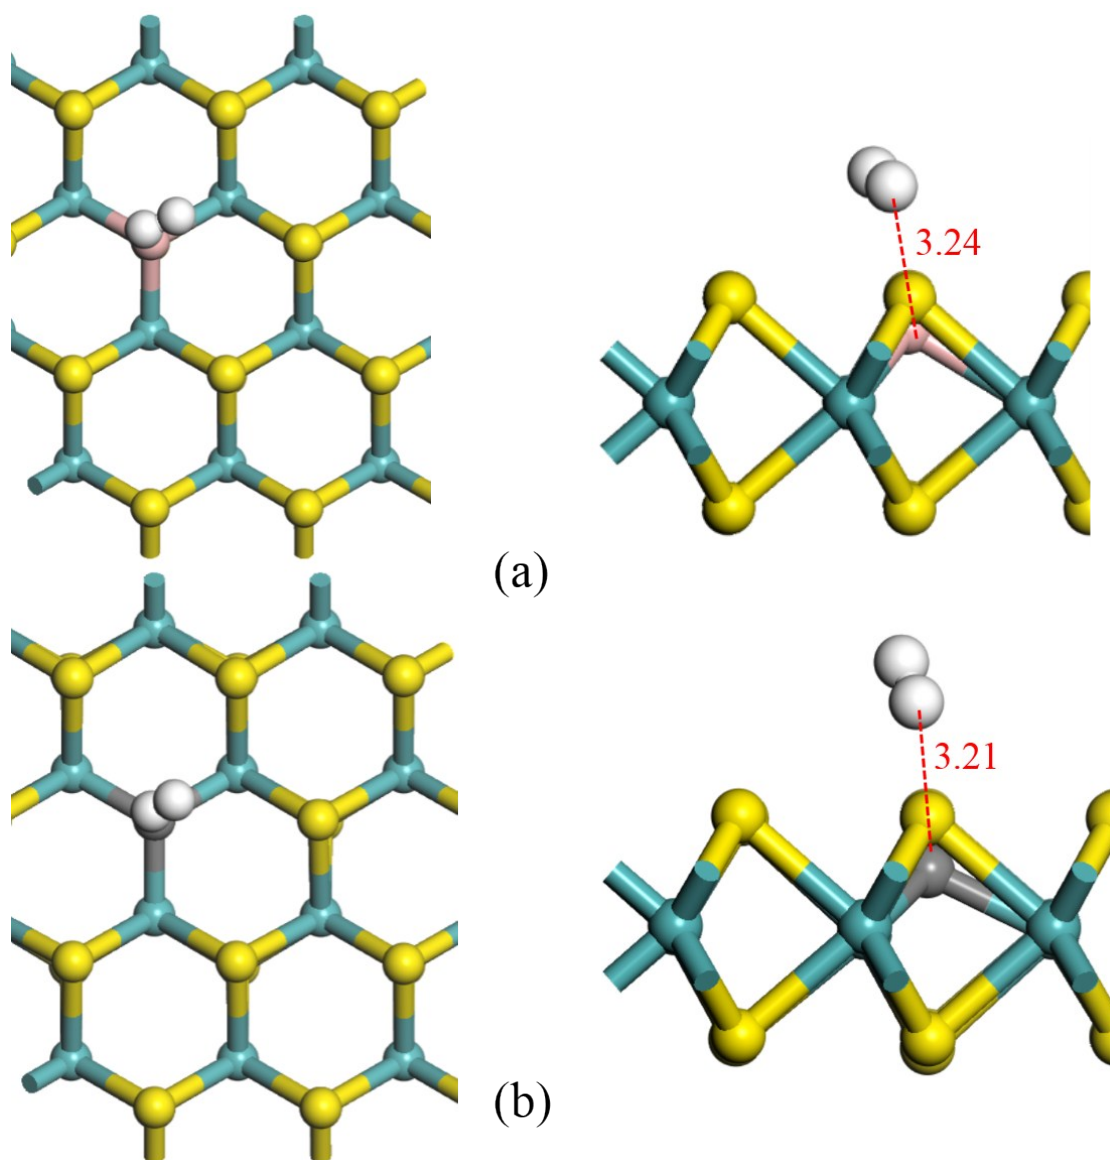

**Figure S3.** H<sub>2</sub> physisorption on (a) B- and (b) C-doped MoS<sub>2</sub> monolayers.

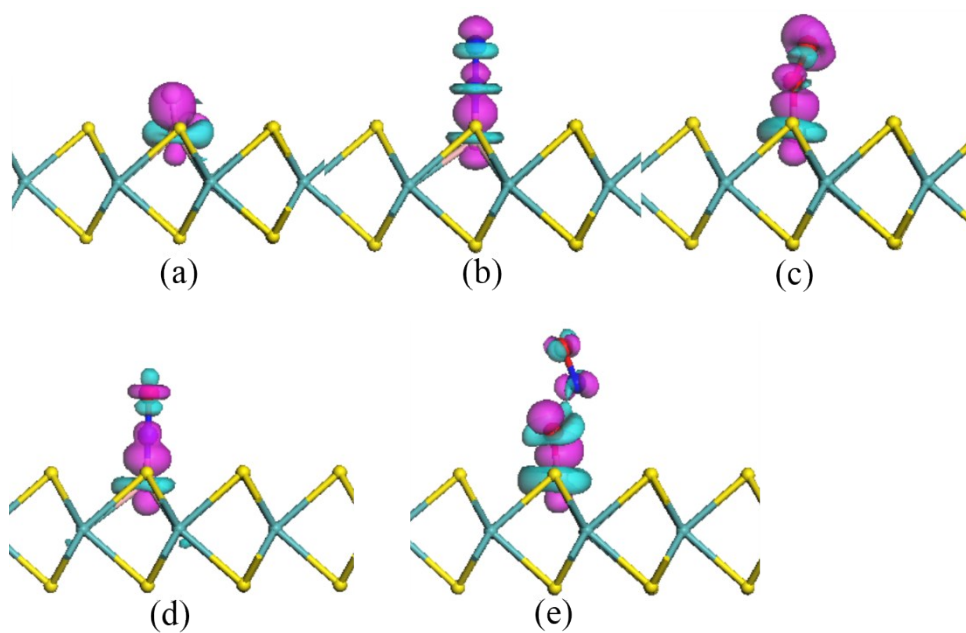

**Figure S4.** The computed charge difference density of (a) H<sub>2</sub>, (b) N<sub>2</sub>, (c) O<sub>2</sub>, (d) NO, and (e) NO<sub>2</sub> molecules adsorbed on B-doped MoS<sub>2</sub> nanosheet. Regions of electron accumulation and depletion are displayed in pink and cyan, respectively. The isosurface value is  $\pm 0.05$  electrons/a.u.<sup>3</sup>.

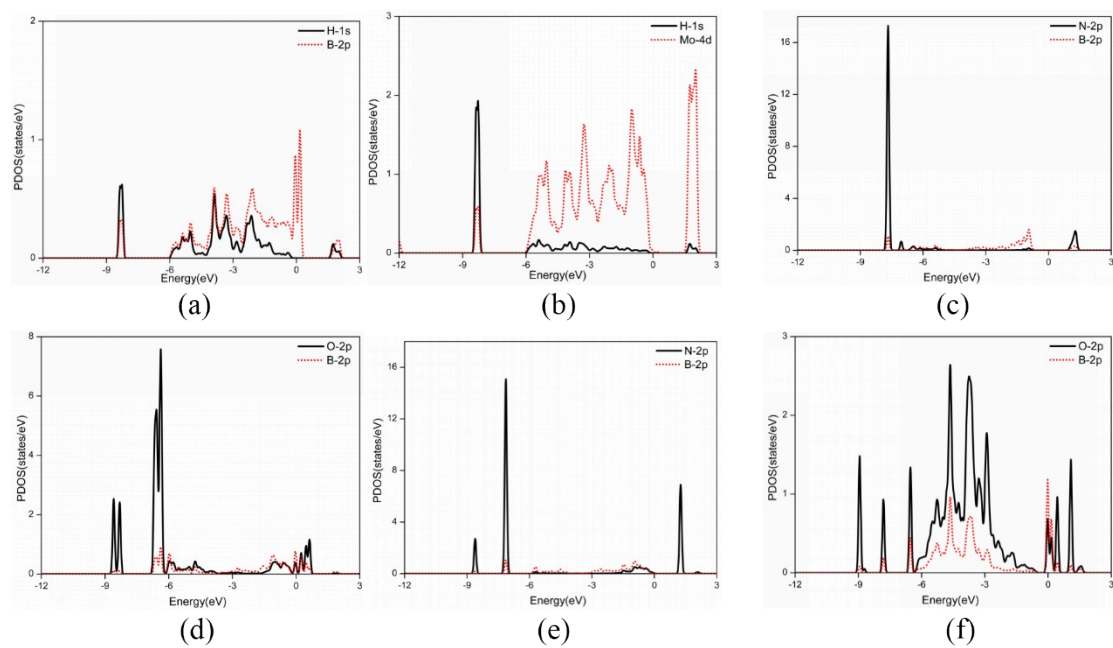

**Figure S5.** The computed projected density of states (PDOSs) of (a) H<sub>2</sub> (H on B), (b) H<sub>2</sub> (H on Mo), (c) N<sub>2</sub>, (d) O<sub>2</sub>, (e) NO, and (f) NO<sub>2</sub> molecules adsorbed on B-doped MoS<sub>2</sub> monolayer.

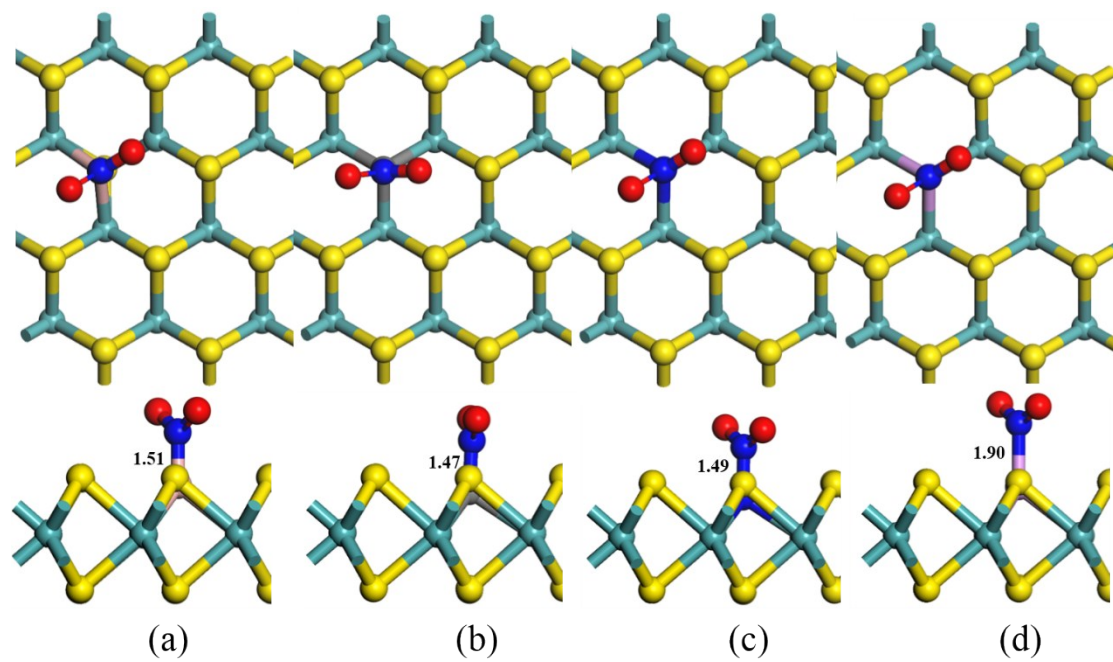

**Figure S6.** The top and side views of the meta-stable configurations for NO<sub>2</sub> molecule adsorption on (a) B-, (b) C-, (c) N-, and (d) P-doped MoS<sub>2</sub> monolayers.



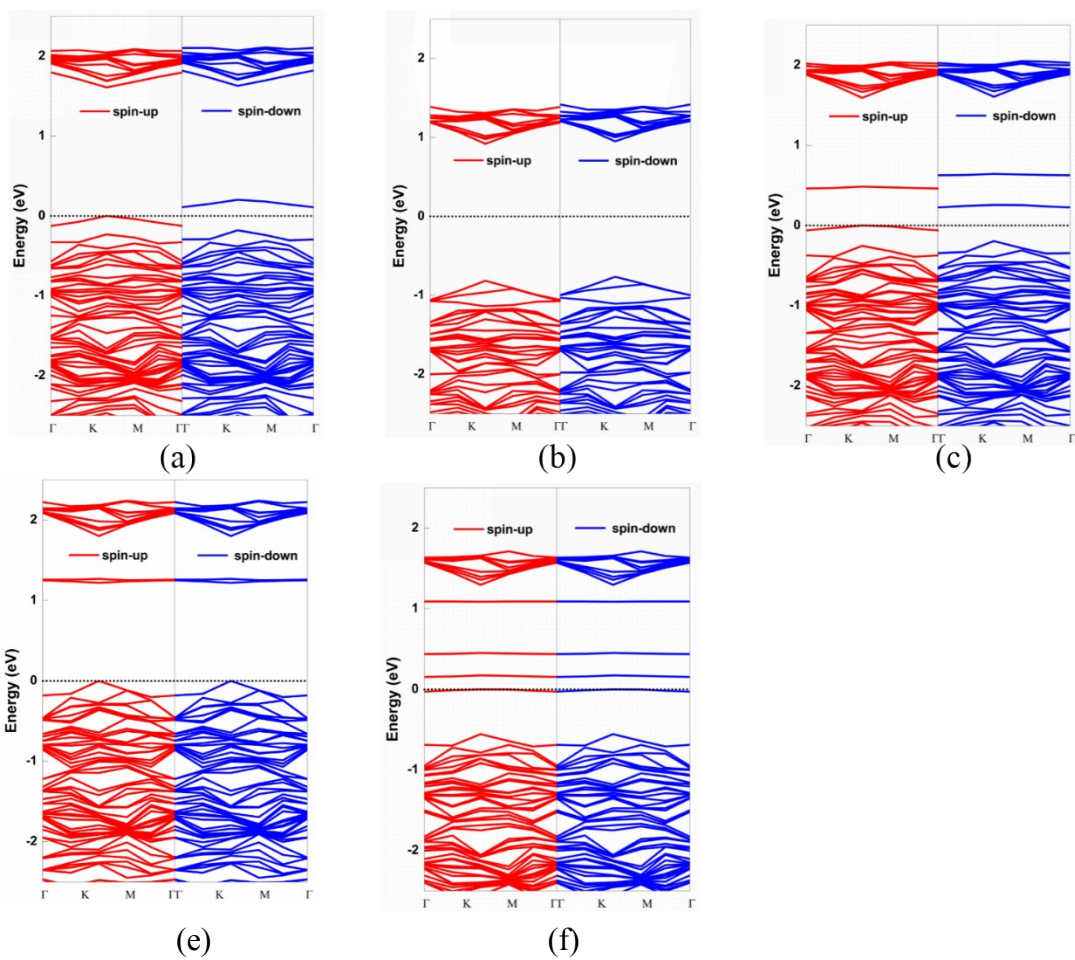

**Figure S7.** The computed band structures of B-doped MoS<sub>2</sub> monolayer adsorbed by (a) H<sub>2</sub>, (b) N<sub>2</sub>, (c) O<sub>2</sub>, (d) NO, and (e) NO<sub>2</sub> molecules. The Fermi level was set zero in dotted lines.

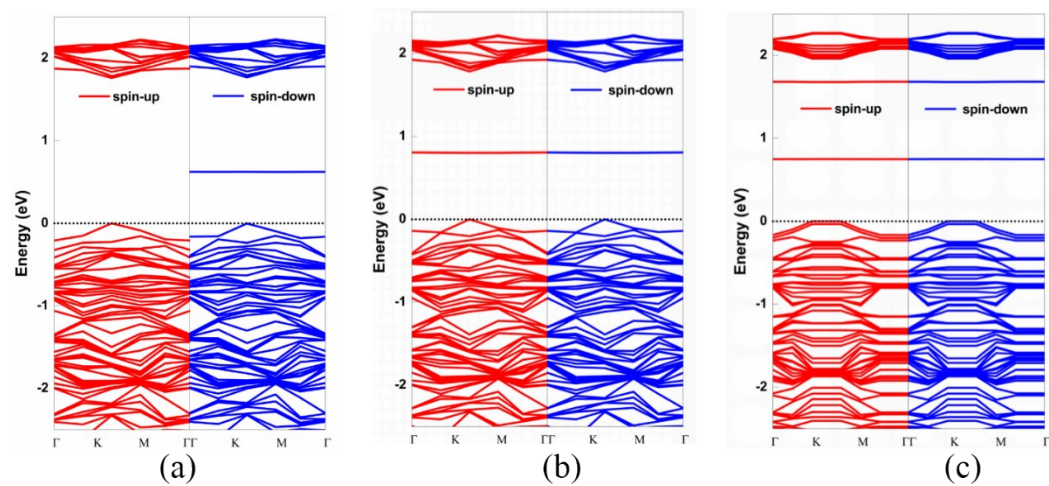

**Figure S8.** The computed band structures of P-doped MoS<sub>2</sub> monolayer adsorbed by (a) O<sub>2</sub>, (b) NO, and (c) NO<sub>2</sub> molecules. The Fermi level was set zero in dotted lines.

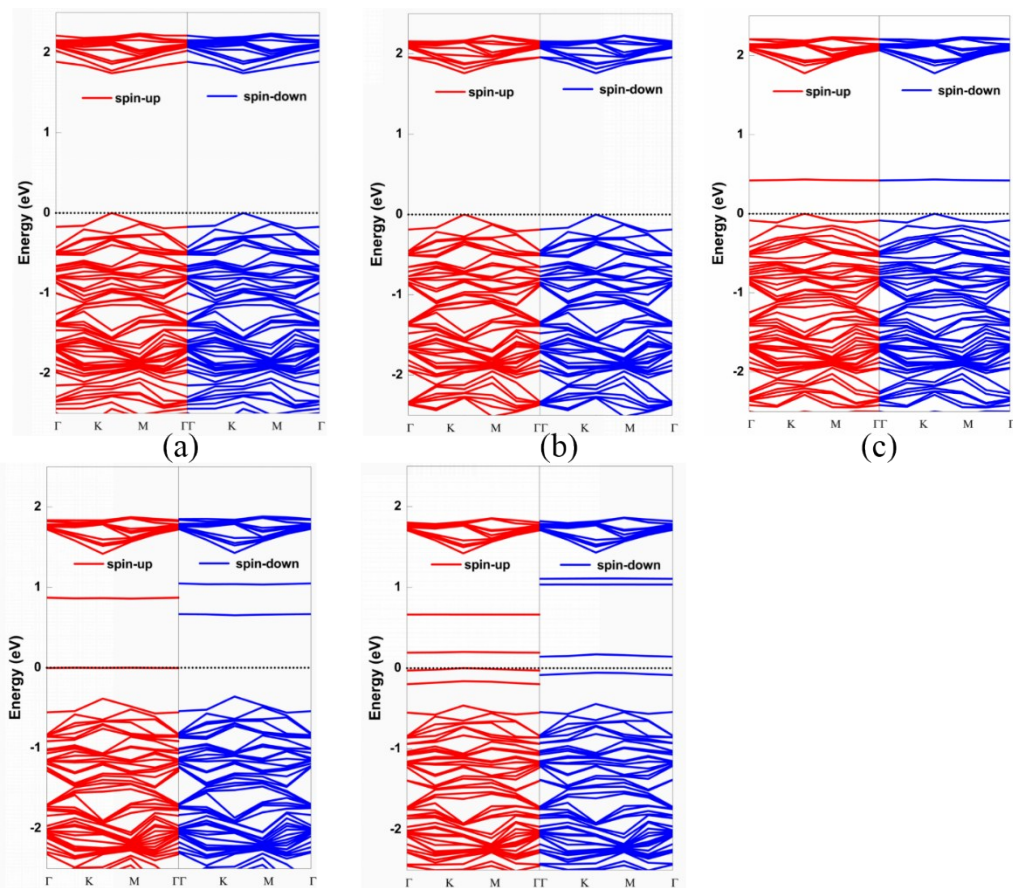

**Figure S9.** The computed band structures of C-doped MoS<sub>2</sub> monolayer adsorbed by (a) H<sub>2</sub>, (b) N<sub>2</sub>, (c) O<sub>2</sub>, (d) NO, and (e) NO<sub>2</sub> molecules. The Fermi level was set zero in dotted lines.

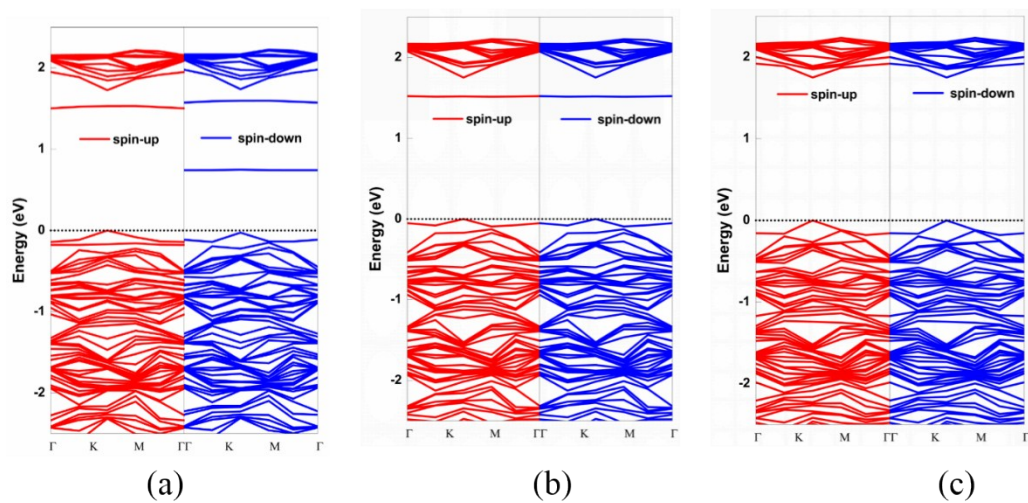

**Figure S10.** The computed band structures of N-doped MoS<sub>2</sub> monolayer adsorbed by (a) O<sub>2</sub>, (b) NO, and (c) NO<sub>2</sub> molecules. The Fermi level was set zero in dotted lines.
